# Supplementary material for: Dosage escalation of antenatal steroids in preterm twin pregnancies does not improve long-term outcome
Source: publisher site journal article supplement (doi:10.1515/jpm-2020-0575), 2021-07-12
Supplement: Supplementary file 1 [file j_jpm-2020-0575_suppl_001.docx]

Supplemental Material S1

| **Categorial outcome parameters** | | **total** | **positive** | |
| --- | --- | --- | --- | --- |
| **n** | **n** | **%** |
| **Neonatal period** | **Neonatology admission** | **198** | **118** | **59.6** |
| **Non-invasive ventilation ≥ 2 continuous hrs** | **132** | **67** | **50.8** |
| **Non-invasive ventilation ≥ 24 continuous hrs** | **132** | **52** | **39.4** |
| **Antibiotic treatment** | **134** | **52** | **38.8** |
| **RDS** | **139** | **52** | **37.4** |
| **Congenital Infection** | **135** | **44** | **32.6** |
| **Apnoea-Bradycardia-Syndrom** | **135** | **41** | **30.4** |
| **Endotracheal intubation** | **133** | **32** | **24.1** |
| **Caffein application** | **131** | **28** | **21.4** |
| **Wet lung** | **133** | **22** | **16.5** |
| **Surfactant** | **133** | **19** | **14.3** |
| **Respiratory insufficiency** | **135** | **19** | **14.1** |
| **Sepsis** | **135** | **14** | **10.5** |
| **Intraventricular hemorrhage (IVH)** | **134** | **7** | **5.2** |
| Retinopathy | 134 | 6 | 4.5 |
| Icterus | 198 | 7 | 3.5 |
| Pneumonia | 134 | 4 | 3 |
| Transfer to another unit | 77 | 2 | 2.6 |
| Pneumothorax | 127 | 3 | 2.4 |
| Necrotising enterocolitis (NEC) | 134 | 3 | 2.2 |
| Necrotising enterocolitis (NEC) and surgery | 134 | 2 | 1.5 |
| Broncho pulmonary disease (BPD) | 198 | 0 | 0 |
| Intraventricular hemorrhage (IVH) and surgery | 134 | 0 | 0 |
| Periventricular leukomalacia (PVL) | 134 | 0 | 0 |
| Retinopathy and surgery | 134 | 0 | 0 |
| **Infancy**  **(21.-24. months)** | **No first free steps after the 15th month of life** | **194** | **181** | **93.3** |
| **Overall impression: no age-appropriate development** | **194** | **31** | **16.0** |
| **Health trouble** | **194** | **14** | **7.2** |
| Behavioral problems such as sleep disorders | 194 | 9 | 4.6 |
| Free walking or striking gait | 194 | 9 | 4.6 |
| Climbing stairs with hold on the railing is missing | 194 | 8 | 4.1 |
| Abnormalities of the genital organs | 194 | 7 | 3.6 |
| Fine motor skills: targeted gripping with the thumb and forefinger tips is missing | 194 | 7 | 3.6 |
| No age-appropriate language understanding - e,g, no pointing to body parts after questioning, no following simple requests | 193 | 5 | 2.6 |
| Skin abnormalities | 194 | 5 | 2.6 |
| Heart abnormalities | 194 | 6 | 2.6 |
| Pulmonary auscultation findings | 193 | 6 | 2.6 |
| Eye abnormalities | 194 | 6 | 2.6 |
| Free bending down (crouching) and coming back up are missing | 194 | 5 | 2.6 |
| Infections | 194 | 3 | 1.5 |
| Illness or surgery at risk of development since the last early diagnosis | 194 | 3 | 1.5 |
| Abdominal organs abnormal findings | 194 | 2 | 1.0 |
| Limb and non-physiological X or O legs; Clubfoot, kink-lowering foot | 194 | 2 | 1.0 |
| Hearing reaction is missing (no head movement to the noise source on the side behind the head) | 194 | 2 | 1.0 |
| Constant asymmetry of tone, movements, reflexes | 194 | 2 | 1.0 |
| Difficulty drinking and eating, vomiting, difficulty swallowing | 194 | 1 | 0.5 |
| Abnormal bowel movements | 194 | 1 | 0.5 |
| Chest and spine malformation or posture such as scoliosis, increased chest kyphosis, lumbar lordosis, lumbar kyphosis, pelvic obliquity | 194 | 1 | 0.5 |
| Restlessness including tremor, conspicuous tone change, conspicuous frightfulness | 194 | 1 | 0.5 |
| Seizures | 192 | 0 | 0 |
| Micturition disorder | 198 | 0 | 0 |
| Skull abnormal head circumference | 194 | 0 | 0 |
| Hypotension | 194 | 0 | 0 |
| Hypertension | 194 |  | 0 |
| **Early childhood**  **(60.-64. months)** | **Pronunciation disorders (e.g. stammering, stuttering, rumbling)** | **187** | **34** | **18.2** |
| **Health disorder** | **187** | **31** | **16.6** |
| **Speech disorders (significant grammatical and / or sentence errors)** | **187** | **25** | **13.4** |
| **Motor clumsiness (e.g. when playing ball, running, jumping)** | **186** | **21** | **11.3** |
| **Eye abnormalities (squint n=3 1,6%; Poor eyesight (monocular vision test with image boards or eye test n=11 5,9%, unspecified n=2 1,1%)** | **187** | **16** | **8.6** |
| **Does not paint or tinker or reluctantly** | **187** | **12** | **6.4** |
| **Behavioral problems (e.g. restricted bladder and bowel control; pronounced difficulty falling asleep and falling asleep; disorders of social behavior such as aggression, no friends, does not play with peers; cannot dress; does not play** | **186** | **11** | **5.9** |
| Hearing impaired hearing; Hearing test | 187 | 9 | 4.8 |
| Cognitive developmental retardation | 187 | 8 | 4.3 |
| Uncertain jumping on one leg at least three times on the right and left | 185 | 7 | 3.8 |
| Lung disease | 187 | 6 | 3.2 |
| Abnormal sexual organs | 187 | 6 | 3.2 |
| > 3 deviations when walking on a line from 2m heel to toe | 186 | 6 | 3.2 |
| Skin abnormalities | 187 | 4 | 2.1 |
| Heart abnormalities | 187 | 4 | 2.1 |
| Limb-unphysiological X- or O-legs, kink-lowering foot | 187 | 4 | 2.1 |
| Cerebral movement disorder | 187 | 3 | 1.6 |
| Understanding of language (often does not understand if something is said to him) | 186 | 3 | 1.6 |
| Shortness of breath at rest and or when under stress | 187 | 3 | 1.6 |
| Abdominal organ abnormalities | 187 | 3 | 1.6 |
| Walking asymmetry | 187 | 3 | 1.6 |
| Fine motor skills - drawing of circle, square and triangle from template is noticeably faulty | 187 | 3 | 1.6 |
| Infections | 187 | 2 | 1.1 |
| Disabled nasal breathing | 187 | 2 | 1.1 |
| Muscle strength abnormalities | 187 | 2 | 1.1 |
| Urinary abnormalities | 187 | 1 | 0.5 |
| Rib cage and spine malformation or posture e.g. Scoliosis, pelvic obliquity | 187 | 1 | 0.5 |
| Patellar tendon reflex or conspicuous side difference | 187 | 1 | 0.5 |
| Seizures | 187 | 0 | 0 |
| Mouth abnormalities | 187 | 0 | 0 |

| **Categorial outcome parameters**  **Males-Males** | | **total** | **positive** | |
| --- | --- | --- | --- | --- |
| **n** | **n** | **%** |
| **Neonatal period** | **CPAP or high flow ≥ 2 continuous hrs** | **42** | **26** | **61.9** |
| **Neonatology admission** | **66** | **35** | **53.0** |
| **Non-invasive ventilation ≥ 24 continuous hrs** | **42** | **20** | **47.6** |
| **Antibiotic treatment** | **42** | **19** | **45.2** |
| **Apnoea-Bradycardia-Syndrom** | **43** | **19** | **44.2** |
| **Congenital Infection** | **43** | **18** | **41.9** |
| **RDS** | **45** | **18** | **40.0** |
| **Endotracheal intubation** | **43** | **15** | **34.9** |
| **Caffein application** | **40** | **12** | **30** |
| **Surfactant** | **42** | **9** | **21.4** |
| **Respiratory insufficiency** | **43** | **8** | **18.6** |
| **Wet lung** | **41** | **7** | **17.1** |
| **Sepsis** | **43** | **6** | **14.0** |
| **Pneumothorax** | **39** | **2** | **5.1** |
| Intraventricular hemorrhage (IVH) | 42 | 2 | 4.8 |
| Necrotising enterocolitis (NEC) | 42 | 2 | 4.8 |
| Icterus | 66 | 2 | 3.0 |
| Retinopathy | 42 | 1 | 2.4 |
| Necrotising enterocolitis (NEC) and surgery | 42 | 1 | 2.4 |
| Pneumonia | 43 | 1 | 2.1 |
| Transfer to another unit | 46 | 0 | 0 |
| Broncho pulmonary disease (BPD) | 66 | 0 | 0 |
| Intraventricular hemorrhage (IVH) and surgery | 42 | 0 | 0 |
| Periventricular leukomalacia (PVL) | 42 | 0 | 0 |
| Retinopathy and surgery | 42 | 0 | 0 |
| **Infancy**  **(21.-24. months)** | **First free steps after the 15th month of life** | **66** | **57** | **86.4** |
| **Overall impression: no age-appropriate development** | **66** | **12** | **18.2** |
| **Free walking or striking gait** | **66** | **7** | **10.6** |
| **Abnormalities of the genital organs** | **66** | **7** | **10.6** |
| **Health trouble** | **66** | **5** | **7.6** |
| **Climbing stairs with hold on the railing is missing** | **66** | **5** | **7.6** |
| **Fine motor skills: targeted gripping with the thumb and forefinger tips is missing** | **66** | **4** | **6.1** |
| Heart abnormalities | 65 | 3 | 4.6 |
| Free bending down (crouching) and coming back up are missing | 66 | 3 | 4.5 |
| Behavioral problems such as sleep disorders | 66 | 2 | 3 |
| Pulmonary auscultation findings | 66 | 1 | 1.5 |
| Infections | 66 | 1 | 1.5 |
| Abdominal organs abnormal findings | 66 | 1 | 1.5 |
| Difficulty drinking and eating. vomiting. difficulty swallowing | 66 | 1 | 1.5 |
| Abnormal bowel movements | 66 | 1 | 1.5 |
| No age-appropriate language understanding - e.g. no pointing to body parts after questioning. no following simple requests | 66 | 0 | 0 |
| Skin abnormalities | 66 | 0 | 0 |
| Eye abnormalities | 66 | 0 | 0 |
| Limb and non-physiological X or O legs; Clubfoot. kink-lowering foot | 66 | 0 | 0 |
| Hearing reaction is missing (no head movement to the noise source on the side behind the head) | 66 | 0 | 0 |
| Constant asymmetry of tone. movements. reflexes | 66 | 0 | 0 |
| Chest and spine malformation or posture such as scoliosis. increased chest kyphosis. lumbar lordosis. lumbar kyphosis. pelvic obliquity | 66 | 0 | 0 |
| Restlessness including tremor. conspicuous tone change. conspicuous frightfulness | 66 | 0 | 0 |
| Seizures | 64 | 0 | 0 |
| Micturition disorder | 66 | 0 | 0 |
| Skull abnormal head circumference | 66 | 0 | 0 |
| Hypotension | 66 | 0 | 0 |
| Hypertension | 66 | 0 | 0 |
| **Early childhood**  **(60.-64. months)** | **Health disorder** | **59** | **16** | **27.1** |
| **Speech disorders (significant grammatical and / or sentence errors)** | **59** | **15** | **25.4** |
| **Pronunciation disorders (e.g. stammering, stuttering, rumbling)** | **59** | **15** | **24.4** |
| **Motor clumsiness (e.g. when playing ball, running, jumping)** | **59** | **6** | **10.2** |
| **Eye abnormalities (squint n=2 3,4%; Poor eyesight (monocular vision test with image boards or eye test n=4 6,8%)** | **59** | **6** | **10.2** |
| **Does not paint or tinker or reluctantly** | **59** | **6** | **10.2** |
| **Abnormal sexual organs (phimoses, Undescended testicles)** | **59** | **6** | **10.2** |
| **Behavioral problems (e.g. restricted bladder and bowel control; pronounced difficulty falling asleep and falling asleep; disorders of social behavior such as aggression, no friends, does not play with peers; cannot dress; does not play** | **58** | **4** | **6.9** |
| **Hearing impaired hearing; Hearing test** | **59** | **3** | **5.1** |
| **Cognitive developmental retardation** | **59** | **3** | **5.1** |
| **Lung disease (asthma)** | **59** | **3** | **5.1** |
| **Shortness of breath at rest and or when under stress** | **59** | **3** | **5.1** |
| Understanding of language (often does not understand if something is said to him) | 58 | 2 | 3.4 |
| Abdominal organ abnormalities | 59 | 2 | 3.4 |
| Fine motor skills - drawing of circle, square and triangle from template is noticeably faulty | 59 | 2 | 3.4 |
| Disabled nasal breathing | 59 | 2 | 3.4 |
| Uncertain jumping on one leg at least three times on the right and left | 57 | 1 | 1.8 |
| > 3 deviations when walking on a line from 2m heel to toe | 59 | 1 | 1.7 |
| Skin abnormalities | 59 | 1 | 1.7 |
| Heart abnormalities | 59 | 1 | 1.7 |
| Limb-unphysiological X- or O-legs, kink-lowering foot | 59 | 1 | 1.7 |
| Cerebral movement disorder | 59 | 1 | 1.7 |
| Walking asymmetry | 59 | 1 | 1.7 |
| Muscle strength abnormalities | 59 | 1 | 1.7 |
| Urinary abnormalities | 59 | 1 | 1.7 |
| Rib cage and spine malformation or posture e.g. Scoliosis, pelvic obliquity | 59 | 1 | 1.7 |
| Infections | 59 | 0 | 0 |
| Patellar tendon reflex or conspicuous side difference | 59 | 0 | 0 |
| Seizures | 59 | 0 | 0 |
| Mouth abnormalities | 59 | 0 | 0 |

| **Categorial outcome parameters**  **Females-Females** | | **total** | **positive** | |
| --- | --- | --- | --- | --- |
| **n** | **n** | **%** |
| **Neonatal period** | **Neonatology admission** | **66** | **43** | **65.2** |
| **CPAP or high flow ≥ 2 continuous hrs** | **46** | **19** | **41.3** |
| **Antibiotic treatment** | **48** | **16** | **33.3** |
| **Non-invasive ventilation ≥ 24 continuous hrs** | **46** | **14** | **30.4** |
| **RDS** | **50** | **15** | **30** |
| **Congenital Infection** | **48** | **12** | **25** |
| **Endotracheal intubation** | **48** | **9** | **18.8** |
| **Caffein application** | **47** | **7** | **14.9** |
| **Wet lung** | **48** | **6** | **12.5** |
| **Apnoea-Bradycardia-Syndrom** | **48** | **5** | **10.4** |
| **Surfactant** | **47** | **4** | **8.5** |
| **Respiratory insufficiency** | **48** | **4** | **8.3** |
| **Sepsis** | **48** | **4** | **8.3** |
| **Retinopathy** | **44** | **4** | **8.3** |
| **Icterus** | **66** | **4** | **6.1** |
| Pneumonia | 47 | 1 | 2.1 |
| Necrotising enterocolitis (NEC) | 48 | 1 | 2.1 |
| Necrotising enterocolitis (NEC) and surgery | 48 | 1 | 2.1 |
| Intraventricular hemorrhage (IVH) | 48 | 0 | 0 |
| Transfer to another unit | 25 | 0 | 0 |
| Pneumothorax | 66 | 0 | 0 |
| Broncho pulmonary disease (BPD) | 66 | 0 | 0 |
| Intraventricular hemorrhage (IVH) and surgery | 48 | 0 | 0 |
| Periventricular leukomalacia (PVL) | 48 | 0 | 0 |
| Retinopathy and surgery | 48 | 0 | 0 |
| **Infancy**  **(21.-24. months)** | **First free steps after the 15th month of life** | **62** | **61** | **98.4** |
| **Health trouble** | **62** | **6** | **9.7** |
| **Overall impression: no age-appropriate development** | **62** | **5** | **8.1** |
| **Behavioral problems such as sleep disorders** | **62** | **4** | **6.5** |
| Pulmonary auscultation findings | 61 | 2 | 3.3 |
| Heart abnormalities | 62 | 2 | 3.2 |
| Infections | 62 | 2 | 3.2 |
| Hearing reaction is missing (no head movement to the noise source on the side behind the head) | 62 | 2 | 3.2 |
| Climbing stairs with hold on the railing is missing | 62 | 1 | 1.6 |
| No age-appropriate language understanding - e.g. no pointing to body parts after questioning. no following simple requests | 62 | 1 | 1.6 |
| Skin abnormalities | 62 | 1 | 1.6 |
| Abdominal organs abnormal findings | 62 | 1 | 1.6 |
| Restlessness including tremor. conspicuous tone change. conspicuous frightfulness | 62 | 1 | 1.6 |
| Free walking or striking gait | 66 | 0 | 0 |
| Abnormalities of the genital organs | 66 | 0 | 0 |
| Fine motor skills: targeted gripping with the thumb and forefinger tips is missing | 66 | 0 | 0 |
| Eye abnormalities | 66 | 0 | 0 |
| Free bending down (crouching) and coming back up are missing | 66 | 0 | 0 |
| Limb and non-physiological X or O legs; Clubfoot. kink-lowering foot | 66 | 0 | 0 |
| Constant asymmetry of tone. movements. reflexes | 66 | 0 | 0 |
| Difficulty drinking and eating. vomiting. difficulty swallowing | 62 | 0 | 0 |
| Abnormal bowel movements | 62 | 0 | 0 |
| Chest and spine malformation or posture such as scoliosis. increased chest kyphosis. lumbar lordosis. lumbar kyphosis. pelvic obliquity | 62 | 0 | 0 |
| Seizures | 62 | 0 | 0 |
| Micturition disorder | 62 | 0 | 0 |
| Skull abnormal head circumference | 62 | 0 | 0 |
| Hypotension | 62 | 0 | 0 |
| Hypertension | 62 | 0 | 0 |
| **Early childhood**  **(60.-64. months)** | **Pronunciation disorders (e.g. stammering, stuttering, rumbling)** | **64** | **9** | **14.1** |
| **Health disorder** | **64** | **6** | **9.4** |
| **Speech disorders (significant grammatical and / or sentence errors)** | **64** | **5** | **7.8** |
| **Eye abnormalities (Poor eyesight (monocular vision test with image boards or eye test n=4 6,3%, unspecified n=1 1,6%)** | **64** | **5** | **7.8** |
| Behavioral problems (e.g. restricted bladder and bowel control; pronounced difficulty falling asleep and falling asleep; disorders of social behavior such as aggression, no friends, does not play with peers; cannot dress; does not play | 64 | 2 | 3.1 |
| Hearing impaired hearing; Hearing test | 64 | 2 | 3.1 |
| Cognitive developmental retardation | 64 | 2 | 3.1 |
| Lung disease (asthma) | 64 | 2 | 3.1 |
| Heart abnormalities | 64 | 2 | 3.1 |
| Infections | 64 | 2 | 3.1 |
| Uncertain jumping on one leg at least three times on the right and left | 64 | 1 | 1.6 |
| Limb-unphysiological X- or O-legs, kink-lowering foot | 64 | 1 | 1.6 |
| Motor clumsiness (e.g. when playing ball, running, jumping) | 64 | 0 | 0 |
| Does not paint or tinker or reluctantly | 64 | 0 | 0 |
| Abnormal sexual organs | 64 | 0 | 0 |
| > 3 deviations when walking on a line from 2m heel to toe | 64 | 0 | 0 |
| Skin abnormalities | 64 | 0 | 0 |
| Cerebral movement disorder | 64 | 0 | 0 |
| Understanding of language (often does not understand if something is said to him) | 64 | 0 | 0 |
| Shortness of breath at rest and or when under stress | 64 | 0 | 0 |
| Abdominal organ abnormalities | 64 | 0 | 0 |
| Walking asymmetry | 64 | 0 | 0 |
| Fine motor skills - drawing of circle, square and triangle from template is noticeably faulty | 64 | 0 | 0 |
| Disabled nasal breathing | 64 | 0 | 0 |
| Muscle strength abnormalities | 64 | 0 | 0 |
| Urinary abnormalities | 64 | 0 | 0 |
| Rib cage and spine malformation or posture e.g. Scoliosis, pelvic obliquity | 64 | 0 | 0 |
| Patellar tendon reflex or conspicuous side difference | 64 | 0 | 0 |
| Seizures | 64 | 0 | 0 |
| Mouth abnormalities | 64 | 0 | 0 |

| **Categorial outcome parameters**  **Mixed** | | **total** | **positive** | |
| --- | --- | --- | --- | --- |
| **n** | **n** | **%** |
| **Neonatal period** | **Neonatology admission** | **66** | **40** | **60.6** |
| **CPAP or high flow ≥ 2 continuous hrs** | **44** | **22** | **50.0** |
| **RDS** | **44** | **19** | **43.2** |
| **Non-invasive ventilation ≥ 24 continuous hrs** | **44** | **18** | **40.9** |
| **Antibiotic treatment** | **44** | **17** | **38.6** |
| **Apnoea-Bradycardia-Syndrom** | **44** | **17** | **38.6** |
| **Congenital Infection** | **44** | **14** | **31.8** |
| **Caffein application** | **44** | **9** | **20.5** |
| **Wet lung** | **44** | **9** | **20.5** |
| **Endotracheal intubation** | **42** | **8** | **19.0** |
| **Respiratory insufficiency** | **44** | **7** | **15.9** |
| **Surfactant** | **44** | **6** | **13.6** |
| **Intraventricular hemorrhage (IVH)** | **44** | **5** | **11.4** |
| **Sepsis** | **44** | **4** | **9.1** |
| **Transfer to another unit** | **32** | **2** | **6.3** |
| Pneumonia | 44 | 2 | 4.5 |
| Retinopathy | 43 | 1 | 2.3 |
| Pneumothorax | 44 | 1 | 2.3 |
| Icterus | 66 | 1 | 1.5 |
| Necrotising enterocolitis (NEC) | 44 | 0 | 0 |
| Necrotising enterocolitis (NEC) and surgery | 44 | 0 | 0 |
| Broncho pulmonary disease (BPD) | 66 | 0 | 0 |
| Intraventricular hemorrhage (IVH) and surgery | 44 | 0 | 0 |
| Periventricular leukomalacia (PVL) | 44 | 0 | 0 |
| Retinopathy and surgery | 43 | 0 | 0 |
| **Infancy**  **(21.-24. months)** | **First free steps after the 15th month of life** | **66** | **63** | **95.5** |
| **Overall impression: no age-appropriate development** | **66** | **12** | **18.2** |
| **Eye abnormalities** | **66** | **6** | **9.1** |
| **No age-appropriate language understanding - e.g. no pointing to body parts after questioning. no following simple requests** | **65** | **4** | **6.2** |
| **Skin abnormalities** | **66** | **4** | **6.2** |
| Health disease | 66 | 3 | 4.5 |
| Behavioral problems such as sleep disorders | 66 | 3 | 4.5 |
| Fine motor skills: targeted gripping with the thumb and forefinger tips is missing | 66 | 3 | 4.5 |
| Pulmonary auscultation findings | 66 | 3 | 4.5 |
| Free walking or striking gait | 66 | 2 | 3.0 |
| Climbing stairs with hold on the railing is missing | 66 | 2 | 3.0 |
| Free bending down (crouching) and coming back up are missing | 66 | 2 | 3.0 |
| Limb and non-physiological X or O legs; Clubfoot. kink-lowering foot | 66 | 2 | 3.0 |
| Constant asymmetry of tone. movements. reflexes | 66 | 2 | 3.0 |
| Heart abnormalities | 66 | 1 | 1.5 |
| Abnormalities of the genital organs | 66 | 0 | 0 |
| Infections | 66 | 0 | 0 |
| Abdominal organs abnormal findings | 66 | 0 | 0 |
| Hearing reaction is missing (no head movement to the noise source on the side behind the head) | 66 | 0 | 0 |
| Difficulty drinking and eating. vomiting. difficulty swallowing | 66 | 0 | 0 |
| Abnormal bowel movements | 66 | 0 | 0 |
| Chest and spine malformation or posture such as scoliosis. increased chest kyphosis. lumbar lordosis. lumbar kyphosis. pelvic obliquity | 66 | 0 | 0 |
| Restlessness including tremor. conspicuous tone change. conspicuous frightfulness | 66 | 0 | 0 |
| Seizures | 66 | 0 | 0 |
| Micturition disorder | 66 | 0 | 0 |
| Skull abnormal head circumference | 66 | 0 | 0 |
| Hypotension | 66 | 0 | 0 |
| Hypertension | 66 | 0 | 0 |
| **Early childhood**  **(60.-64. months)** | **Pronunciation disorders (e.g. stammering, stuttering, rumbling)** | **64** | **10** | **15.6** |
| **Health disorder** | **64** | **9** | **14.1** |
| **Speech disorders (significant grammatical and / or sentence errors)** | **64** | **8** | **12.5** |
| **Motor clumsiness (e.g. when playing ball, running, jumping)** | **64** | **6** | **9.4** |
| **Does not paint or tinker or reluctantly** | **64** | **6** | **9.4** |
| **> 3 deviations when walking on a line from 2m heel to toe** | **63** | **5** | **7.9** |
| **Eye abnormalities (squint n=1 1,6%; Poor eyesight (monocular vision test with image boards or eye test n=3 4,7%, unspecified n=1 1,6%)** | **64** | **5** | **7.8** |
| **Behavioral problems (e.g. restricted bladder and bowel control; pronounced difficulty falling asleep and falling asleep; disorders of social behavior such as aggression, no friends, does not play with peers; cannot dress; does not play** | **64** | **5** | **7.8** |
| **Uncertain jumping on one leg at least three times on the right and left** | **64** | **5** | **7.8** |
| **Hearing impaired hearing; Hearing test** | **64** | **4** | **6.3** |
| Skin abnormalities | 64 | 3 | 4.7 |
| Cognitive developmental retardation | 64 | 2 | 3.1 |
| Limb-unphysiological X- or O-legs, kink-lowering foot | 64 | 2 | 3.1 |
| Cerebral movement disorder | 64 | 2 | 3.1 |
| Walking asymmetry | 64 | 2 | 3.1 |
| Lung disease (asthma) | 64 | 1 | 1.6 |
| Heart abnormalities | 64 | 1 | 1.6 |
| Understanding of language (often does not understand if something is said to him) | 64 | 1 | 1.6 |
| Abdominal organ abnormalities | 64 | 1 | 1.6 |
| Fine motor skills - drawing of circle, square and triangle from template is noticeably faulty | 64 | 1 | 1.6 |
| Muscle strength abnormalities | 64 | 1 | 1.6 |
| Patellar tendon reflex or conspicuous side difference | 64 | 1 | 1.6 |
| Abnormal sexual organs | 64 | 0 | 0 |
| Shortness of breath at rest and or when under stress | 64 | 0 | 0 |
| Infections | 64 | 0 | 0 |
| Disabled nasal breathing | 64 | 0 | 0 |
| Urinary abnormalities | 64 | 0 | 0 |
| Rib cage and spine malformation or posture e.g. Scoliosis, pelvic obliquity | 64 | 0 | 0 |
| Seizures | 64 | 0 | 0 |
| Mouth abnormalities | 64 | 0 | 0 |
