# Supplementary material for: Dosage escalation of antenatal steroids in preterm twin pregnancies does not improve long-term outcome
Source: publisher site journal article supplement (doi:10.1515/jpm-2020-0575), 2021-07-12
Supplement: Supplementary file 2 [file j_jpm-2020-0575_suppl_002.docx]

| **Neonatal period**  -categorial outcome parameters with ≥5% prevalence- | **Dosis** | **male-male**  **n (%)** | **p-value*** | **female-female**  **n (%)** | **p-value*** | **mixed**  **n (%)** | **p-value*** |
| --- | --- | --- | --- | --- | --- | --- | --- |
| Neonatology admission  (118 of 198, 59.6%) | 16 mg | 18 of 34 (52.9) | 0.979 | 27 of 36 (75.0) | 0.178 | 14 of 26 (53.8) | 0.404 |
| =24 mg | 13 of 24 (54.2) | 11 of 20 (55.0) | 21 of 34 (61.8) |
| >24mg | 4 of 8 (50.0) | 5 of 10 (50.0) | 5 of 6 (83.3) |
| Non-invasive ventilation ≥ 2 continuous hrs  (67 of 132, 50.8%) | 16 mg | 16 of 22 (72.7) | 0.192 | 10 of 26 (38.5) | 0.383 | 6 of 16 (37.5) | 0.319 |
| =24 mg | 6 of 14 (42.9) | 8 of 15(53.3) | 14 of 23 (60.9) |
| >24mg | 4 of 6 (66.7) | 1 of 5 (20.0) | 2 of 5 (40.0) |
| Non-invasive ventilation ≥ 24 continuous hrs  (52 of 132, 39.4%) | 16 mg | 11 of 22 (50.0) | 0.424 | 9 of 26 (34.6) | 0.751 | 5 of 16 (31.3) | 0.255 |
| =24 mg | 5 of 14 (35.7) | 4 of 15 (26.7) | 12 of 23 (52.2) |
| >24mg | 4 of 6 (66.7) | 1 of 5 (20.0) | 1 of 5 (20.0) |
| Antibiotic treatment  (52 of 134, 38.8%) | 16 mg | 9 of 21 (42.9) | 0.515 | 10 of 28 (35.7) | 0.790 | 4 of 16 (25.0) | **0.009a** |
| =24 mg | 6 of 15 (40.0) | 5 of 15 (33.3) | 8 of 23 (34.8) |
| >24mg | 4 of 16 (66.7) | 1 of 5 (20.0) | 5 of 5 (100.0)1 |
| RDS  (52 of 139, 37.4%) | 16 mg | 7 of 22 (31.8) | 0.544 | 9 of 28 (32.1) | 0.297 | 4 of 16 (25.0) | 0.077 |
| =24 mg | 8 of 17 (47.1) | 6 of 17 (35.3) | 11 of23 (47.8) |
| >24mg | 3 of 6 (50.0) | 0 of 5 (0) | 4 of 5(80.0) |
| Congenital Infection  (44 of 135, 32.6%) | 16 mg | 11 of 22 (50.0) | **0.007b** | 6 of 28 (21.4) | 0.666 | **1 of 16 (6.3)²** | **<0.001c** |
| =24 mg | **2 of 15 (13.3)1** | 5 of 15 (33.3) | 8 of 23 (34.8) |
| >24mg | 5 of 6 (83.3) | 1 of 5 (20.0) | 5 of 5 (100.0)1 |
| Apnoea-Bradycardia-Syndrom  (41 of 135, 30.4%) | 16 mg | 14 of 22 (63.6) | **0.010d** | 3 of 28 (10.7) | 0.697 | 6 of 16 (37.5) | 0.993 |
| =24 mg | **2 of 15 (13.3)1** | 2 of 15 (13.3) | 9 of 23 (39.1) |
| >24mg | 3 of 6 (50.0) | 0 of 5 (0.0) | 2 of 5 (40.0) |
| Endotracheal intubation  (32 of 133, 24.1) | 16 mg | 8 of 22 (36.4) | 0.585 | 6 of 28 (21.4) | 0.522 | 2 of 14 (14.3) | 0.434 |
| =24 mg | 4 of 15 (26.7) | 3 of 15 (20.0) | 4 of 23 (17.4) |
| >24mg | 3 of 6 (50.0) | 0 of 5 (0.0) | 2 of5 (40.0) |
| Coffein application  (289 of 131, 21.4%) | 16 mg | 6 of 20 (30.0) | 0.978 | 4 of 27 (14.8) | 0.553 | 5 of 16 (31.3) | 0.118 |
| =24 mg | 4 of 14 (28.6) | 3 of 15 (20.0) | 2 of 23 (8.7) |
| >24mg | 2 of 6 (33.3) | 0 of 5 (0.0) | 2 of 5 (40.0) |
| Wet lung  (22 of 133, 16.5%) | 16 mg | 5 of 22 (22.7) | 0.521 | 2 of 28 (7.1) | 0.414 | 4 of 16 (25.0) | 0.469 |
| =24 mg | 1 of 13 (7.7) | 3 of 15 (20.0) | 5 of 23 (21.7) |
| >24mg | 1 of 6 (16.7) | 1 of 5 (20.0) | 0 of 5 (0.0) |
| Surfactant  (19 of 133, 14.3%) | 16 mg | 4 of 22 (18.2) | 0.176 | 3 of 27 (11.0) | 0.682 | 3 of 16 (18.8) | 0.562 |
| =24 mg | 2 of 14 (14.3) | 1 of 15 (6.7) | 3 of 23 (13.0) |
| >24mg | 3 of 6 (50.0) | 0 of 5 (0.0) | 0 of 0 (0.0) |
| Respiratory insufficiency  (19 of 135, 14.1%) | 16 mg | 3 of 22 (13.6) | 0.601 | 2 of 28 (7.1) | 0.607 | 3 of 16 (18.8) | 0.861 |
| =24 mg | 4 of 15 (26.7) | 2 of 15 (13.3) | 3 of 23 (13.0) |
| >24mg | 1 of 6 (16.7) | 0 of 5 (0.0) | 1 of 5 (20.0) |
| Sepsis  (14 of 134, 10.5%) | 16 mg | 2 of 22 (9.1) | **0.022e** | 1 of 28 (3.6) | 0.331 | 1 of 16 (6.3) | **<0.001f** |
| =24 mg | 1 of 15 (6.7) | 2 of 15 (13.3) | 0 of 23 (0.0) |
| >24mg | 3 of 6 (50.0)1 | 1 of 5 (20.0) | 3 of 5 (60.0)1 |
| Intraventricular hemorrhage (IVH)  (7 of 134, 5.2%) | 16 mg | 1 of 21 (4.8) | 0.811 | 0 of 28 (0.0) | n.a. | 4 of 16 (25.0) | 0.094 |
| =24 mg | 1 of 15 (6.7) | 0 of 15 (0.0) | 1 of 23 (4.3) |
| >24mg | 0 of 6 (0.0) | 0 of 5 (0.0) | 0 of 5 (0.0) |

**Supplement S2A: The effect of antenatal betamethasone doses and twin pair structure on neonatal outcome.** *A chi-square test with post-hoc Bonferroni correction was used to compare the effect of dosis on neonatal outcome parameters within the twin pair structure subgroups. If significant, subgroup analysis between doses were performed. **a)** χ²(2)=9.340, p=0.009, ϕ=0.461 (mixed >24mg p=0.003 Bonferroni post hoc test); 1subgroup analysis mixed >24mg vs. ≤24mg χ²(2)=8.959, p=0.003, ϕ=0.451, OR 1.417 (95%CI 1.042-1.925), 50% of expected cell frequencies were lower than 5; **b)** χ²(2)=9.855, p=0.007, ϕ=0.479 (male-male =24mg p=0.006 Bonferroni post hoc test); 1subgroup analysis male-male 24mg vs. <24mg> χ²(2)=7.703, p=0.006, ϕ=0.423, OR 0.115 (95%CI 0.022-0.611), all of expected cell frequencies were greater than 5; **c)** χ²(2)=15.629, p<0.001, ϕ=0.596 (mixed ≤16mg p=0.006 and >24mg p=0.001 Bonferroni post hoc test); 1subgroup analysis mixed >24mg vs. ≤24mg χ²(2)=12.088, p=0.001, ϕ=0.524, OR 1.566 (95%CI 1.053-2.299), 50% of expected cell frequencies were lower than 5; 2subgroup analysis mixed ≤16mg vs. >16mg χ²(2)=7.577, p=0.006, ϕ=0.415, OR 0.583 (95%CI 0.366-0.792), all of expected cell frequencies were greater than 5; **d)** χ²(2)=9.247, p=0.010, ϕ=0.464 (male-male 24mg p=0.003 Bonferroni post hoc test); 1subgroup analysis male-male 24mg vs. <24mg> χ²(2)=8.891, p=0.003, ϕ=0.455, OR 0.512 (95%CI 0.323-0.813), all of expected cell frequencies were greater than 5; **e)** χ²(2)=7.590, p=0.022, ϕ=0.420 (male-male >24mg p=0.006 Bonferroni post hoc test); 1subgroup analysis mixed >24mg vs. ≤24mg χ²(2)=7.546, p=0.027, ϕ=0.419, OR 1.838 (95%CI 0.821-4.114), 25% of expected cell frequencies were lower than 5; **f)** χ²(2)=7.590, p=0.022, ϕ=0.420 (mixed >24mg p<0.001 Bonferroni post hoc test); 1subgroup analysis mixed >24mg vs. ≤24mg χ²(2)=17.690, p=0.003, ϕ=0.634, OR 3.800 (95%CI 0.695-20.777), 75% of expected cell frequencies were lower than 5.

| **Infancy (21-24 months)**  -categorial outcome parameters with ≥5% prevalence- | **Dosis** | **male-male**  **n (%)** | **p-value*** | **female-female**  **n (%)** | **p-value*** | **mixed**  **n (%)** | **p-value*** |
| --- | --- | --- | --- | --- | --- | --- | --- |
| No first free steps after 15months  (181 of 194, 93.3) | 16 mg | 29 of 34 (85.3) | 0.476 | 34 of 35 (97.1) | 0.676 | 25 of 26 (96.2) | 0.323 |
| =24 mg | 20 of 24 (83.3) | 18 of 18 (100.0) | 33 of 34 (97.1) |
| >24mg | 8 of 8 (100.0) | 9 of 9 (100.0) | 5 of 6 (83.3) |
| Overall impression: no age-appropriate development  (n=31 of 194, 16.0%) | 16 mg | 8 of 34 (23.5) | 0.789 | 3 of 35 (8.6) | 0.598 | 5 of 26 (19.2) | 0.983 |
| =24 mg | 5 of 24 (20.8) | 2 of 18 (11.1) | 6 of 43 (17.6) |
| >24mg | 1 of 8 (12.5) | 0 of 9 (0.0) | 1 of 6 (16.7) |
| Health trouble  (14 of 194, 7.2%) | 16 mg | 2 of 34 (5.9) | 0.804 | 2 of 35 (5.7) | 0.089 | 1 of 26 (3.8) | 0.323 |
| =24 mg | 2 of 24 (8.3) | 4 of 18 (22.2) | 1 of 34 (2.9) |
| >24mg | 1 of 8 (12.5) | 0 of 9 (0.0) | 1 of 6 (16.7) |

**Supplement S2B: The effect of antenatal betamethasone doses and twin pair structure on infant’s outcome.** *A chi-square test with post-hoc Bonferroni correction was used to compare the effect of dosis on neonatal outcome parameters within the twin pair structure subgroups. If significant, subgroup analysis between doses were performed.

| **Early childhood (60-64 months)**  -categorial outcome parameters with ≥5% prevalence- | **Dosis** | **male-male**  **n (%)** | **p-value*** | **female-female**  **n (%)** | **p-value*** | **mixed**  **n (%)** | **p-value*** |
| --- | --- | --- | --- | --- | --- | --- | --- |
| Pronunciation disorders  (34 of 187, 18.2%) | 16 mg | 7 of 28 (25.0) | 0.150 | 5 of 35 (14.3) | 0.680 | 3 of 24 (12.5) | 0.866 |
| =24 mg | 8 of 23 (34.8) | 2 of 20 (10.0) | 6 of 34 (17.6) |
| >24mg | 0 of 8 (0.0.) | 2 of 9 (22.2) | 1 of 6 (16.7) |
| Health disorder  (31 of 187, 16.6%) | 16 mg | 9 of 28 (32.1) | 0.177 | 2 of 35 (5.7) | 0.315 | 1 of 24 (4.2) | 0.204 |
| =24 mg | 7 of23 (30.4) | 2 of 20 (10.0) | 7 of 34 (20.6) |
| >24mg | 0 of 8 (0.0) | 2 of 9 (22.2) | 1 of 6 (16.7) |
| Speech disorders  (25 of 187, 13.4%) | 16 mg | 6 of 28 (21.4) | 0.282 | 1 of 35 (2.9) | 0.141 | 2 of 24 (8.3) | 0.731 |
| =24 mg | 6 of 23 (26.1) | 2 of 20 (10.0) | 5 of 34 (14.7) |
| >24mg | 0 of 8 (0.0) | 2 of 9 (22.2) | 1 of 6 (16.7) |
| Motor clumsiness  (21 of 186, 11.3%) | 16 mg | **11 of 28 (39.3)1** | **0.010a** | 1 of 35 (2.9) | 0.656 | 1 of 24 (4.2) | 0.401 |
| =24 mg | 2 of 22 (9.1) | 0 of 20 (0.0) | 5 of 34 (14.7) |
| >24mg | 0 of 8 (0.0) | 0 of 9 (0.0) | 1 of 6 (16.7) |
| Eye abnormalities  (16 of 187, 8.6%) | 16 mg | 4 of 28 (14.3) | 0.477 | 1 of 35 (2.9) | **0.008b** | 3 of 24 (12.5) | 0.286 |
| =24 mg | 2 of 23 (8.7) | 1 of 20 (5.0) | 1 of 34 (2.9) |
| >24mg | 0 of 8 (0.0) | 3 of 9 (33.3)1 | 1 of 6 (16.7) |
| Does not paint or tinker or reluctantly  (12 of 187, 5.9%) | 16 mg | 4 of 28 (14.3) | 0.477 | 0 of 35 (0.0) | n.a. | 1 of 24 (4.2) | 0.504 |
| =24 mg | 2 of 23 (8.7) | 0 of 20 (0.0) | 4 of 34 (11.8) |
| >24mg | 0 of 8 (0.0) | 0 of 9 (0.0) | 1 of 6 (16.7) |
| Behavioral problems  (11 of 186, 5.9%) | 16 mg | 1 of 28 (3.6) | 0.268 | 1 of 35 (2.9) | 0.767 | 2 of 24 (8.3) | 0.658 |
| =24 mg | 3 of 22 (13.6) | 1 of 20 (5.0) | 2 of 34 (5.9) |
| >24mg | 0 of 8 (0.0) | 0 of 9 (0.0) | 1 of 6 (16.7) |

**Supplement S2C: The effect of antenatal betamethasone doses and twin pair structure on early childhood’s outcome.** *A chi-square test with post-hoc Bonferroni correction was used to compare the effect of dosis on neonatal outcome parameters within the twin pair structure subgroups. If significant, subgroup analysis between doses were performed. **a)** χ²(2)=9.140, p=0.010, ϕ=0.397 (male-male p=0.003 Bonferroni post hoc test), 1subgroup analysis male-male ≤16mg vs. >16mg χ²(2)=8.861, p=0.003, ϕ=0.391, OR 4.044 (95%CI 1.108-14.766), all expected cell frequencies were greater than 5; **b)** χ²(2)=9.552, p=0.008, ϕ=0.386 (female-female p=0.002 Bonferroni post hoc test), 1subgroup analysis female-female >24mg vs. ≤24mg χ²(2)=9.471, p=0.017, ϕ=0.385, OR 2.246 (95%CI 0.765-6.593), 50% of cell frequencies were lower than 5; n.a.=due to low case numbers statistical analysis not available
